# Supplementary material for: Degradation of pendimethalin by the yeast YC2 and determination of its two main metabolites
Source: Royal Society of Chemistry journal article supplement (doi:10.1039/c8ra07872f), 2019-01-01
Supplement: c8ra07872f1.pdf [file c8ra07872f1.pdf]

TGCGGAAGGATCATTAAAAAATACATTACACATTGTTTTTGCgaACAAAAAATAAATTTTTTATTGGAATTTCT  
TAATATCAAACTTTCAACAACGGATCTTTGGTTCTCGCATCGATGAAGAACGCAGCGAATTGCGATACGTAGT  
ATGACTTGACGACGTGAATCATCGAATCTTTGAACGCACATTGCGCCTCGAGGCATTCCTCGAGGCATGCCTGTT  
TGAGCGTCGCATCCCCTCTAACCCCGGTTAGGCGTTGCTCCGAAATATCAACCGCGCTGTCAAACACGTTTACA  
GCACGACATTTGCCCCTCAAATCAGGTAGGACTACCCGCTGAACTTAAGCATATCA
